# Supplementary material for: Pharmacologically inducing regenerative cardiac cells by small molecule drugs
Source: eLife journal article supplement (doi:10.7554/elife.93405), 2024-01-08
Supplement: fig1-data1 [file elife-93405-fig1-data1-v1.zip]

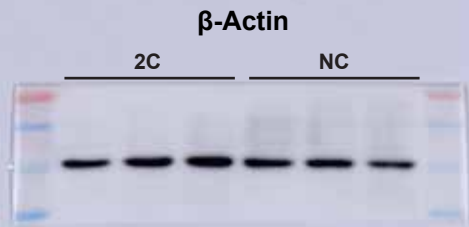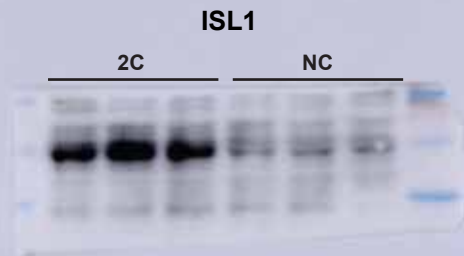

**Figure 1, Source Data 1.** Original western blot corresponding to Figure 1F. Western blot shows the expression of  $\beta$ -Actin (left panel) and ISL1 (right panel) in DMSO (NC) or 2C-treated CMs for 60 hours.
