# Supplementary material for: Pharmacologically inducing regenerative cardiac cells by small molecule drugs
Source: eLife journal article supplement (doi:10.7554/elife.93405), 2024-01-08
Supplement: fig3-figsupp1-data1 [file elife-93405-fig3-figsupp1-data1-v1.zip]

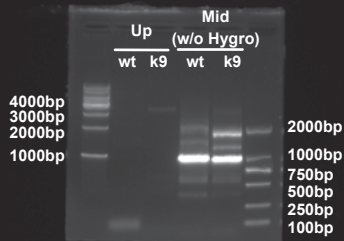

**Figure 3, figure supplement 1, source data 2.** Original gel image corresponding to Figure 3—figure supplement 1B. Genomic PCR confirmed establishment of heterozygous cell lines with ISL1-mCherry knocked in the targeted ISL1 locus.
